# Supplementary material for: Broad-spectrum CRISPR-mediated inhibition of SARS-CoV-2 variants and endemic coronaviruses in vitro
Source: PubMed Central journal article supplement (PMC9119983; doi:10.1038/s41467-022-30546-7), 2022-05-19
Supplement: 41467_2022_30546_MOESM1_ESM.pdf [file 41467_2022_30546_MOESM1_ESM.pdf]

## **Broad-spectrum CRISPR-mediated inhibition of SARS-CoV-2 variants and endemic coronaviruses in vitro**

Leiping Zeng<sup>1\*</sup>, Yanxia Liu<sup>1\*</sup>, Xammy Huu Nguyen<sup>2</sup>, Timothy R. Abbott<sup>1</sup>, Mengting Han<sup>1</sup>, Yanyu Zhu<sup>1</sup>, Augustine Chemparathy<sup>1</sup>, Xueqiu Lin<sup>1</sup>, Xinyi Chen<sup>1</sup>, Haifeng Wang<sup>1</sup>, Draven A. Rane<sup>1</sup>, Jordan M. Spatz<sup>3</sup>, Saket Jain<sup>4</sup>, Arjun Rustagi<sup>5</sup>, Benjamin Pinsky<sup>5,6</sup>, Adrianna E. Zepeda<sup>7</sup>, Anastasia P. Kadina<sup>7</sup>, John A. Walker III<sup>7</sup>, Kevin Holden<sup>7</sup>, Nigel Temperton<sup>8</sup>, Jennifer R. Cochran<sup>1</sup>, Annelise E. Barron<sup>1</sup>, Michael D. Connolly<sup>9</sup>, Catherine A. Blish<sup>5,11</sup>, David B. Lewis<sup>3</sup>, Sarah A. Stanley<sup>2†</sup>, Marie F. La Russa<sup>1†</sup>, Lei S Qi<sup>1,10,11†</sup>

**Affiliations:** <sup>1</sup>Department of Bioengineering, Stanford University, Stanford, CA 94305; <sup>2</sup>Department of Molecular and Cellular Biology, University of California, Berkeley, CA 94720; <sup>3</sup>Department of Pediatrics, Stanford University, Stanford, CA 94305; <sup>4</sup>University of California San Francisco, San Francisco, CA 94143; <sup>5</sup>Department of Medicine, Stanford University, Stanford, CA 94305; <sup>6</sup>Department of Pathology, Stanford University, Stanford CA; <sup>7</sup>Synthego Corporation, Redwood City, CA; <sup>8</sup>Viral Pseudotype Unit, Medway School of Pharmacy, Chatham, Kent ME4 4TB, United Kingdom; <sup>9</sup>Lawrence Berkeley National Laboratory, Berkeley, CA 94720; <sup>10</sup>ChEM-H, Stanford University, Stanford, CA 94305; <sup>11</sup>Chan Zuckerberg BioHub, San Francisco, CA 94158.

\*These authors made equal contributions to the work.

† Correspondence: S.A.S. ([sastanley@berkeley.edu](mailto:sastanley@berkeley.edu)), M.F.L. ([mlarussa@stanford.edu](mailto:mlarussa@stanford.edu)), L.S.Q. ([stanley.qi@stanford.edu](mailto:stanley.qi@stanford.edu))

**Keywords:** broad-spectrum antiviral, CRISPR-Cas13, PAC-MAN, antiviral, SARS-CoV-2, COVID-19, 229E, OC43, antiviral drugs, treatment

## Supplementary Figures

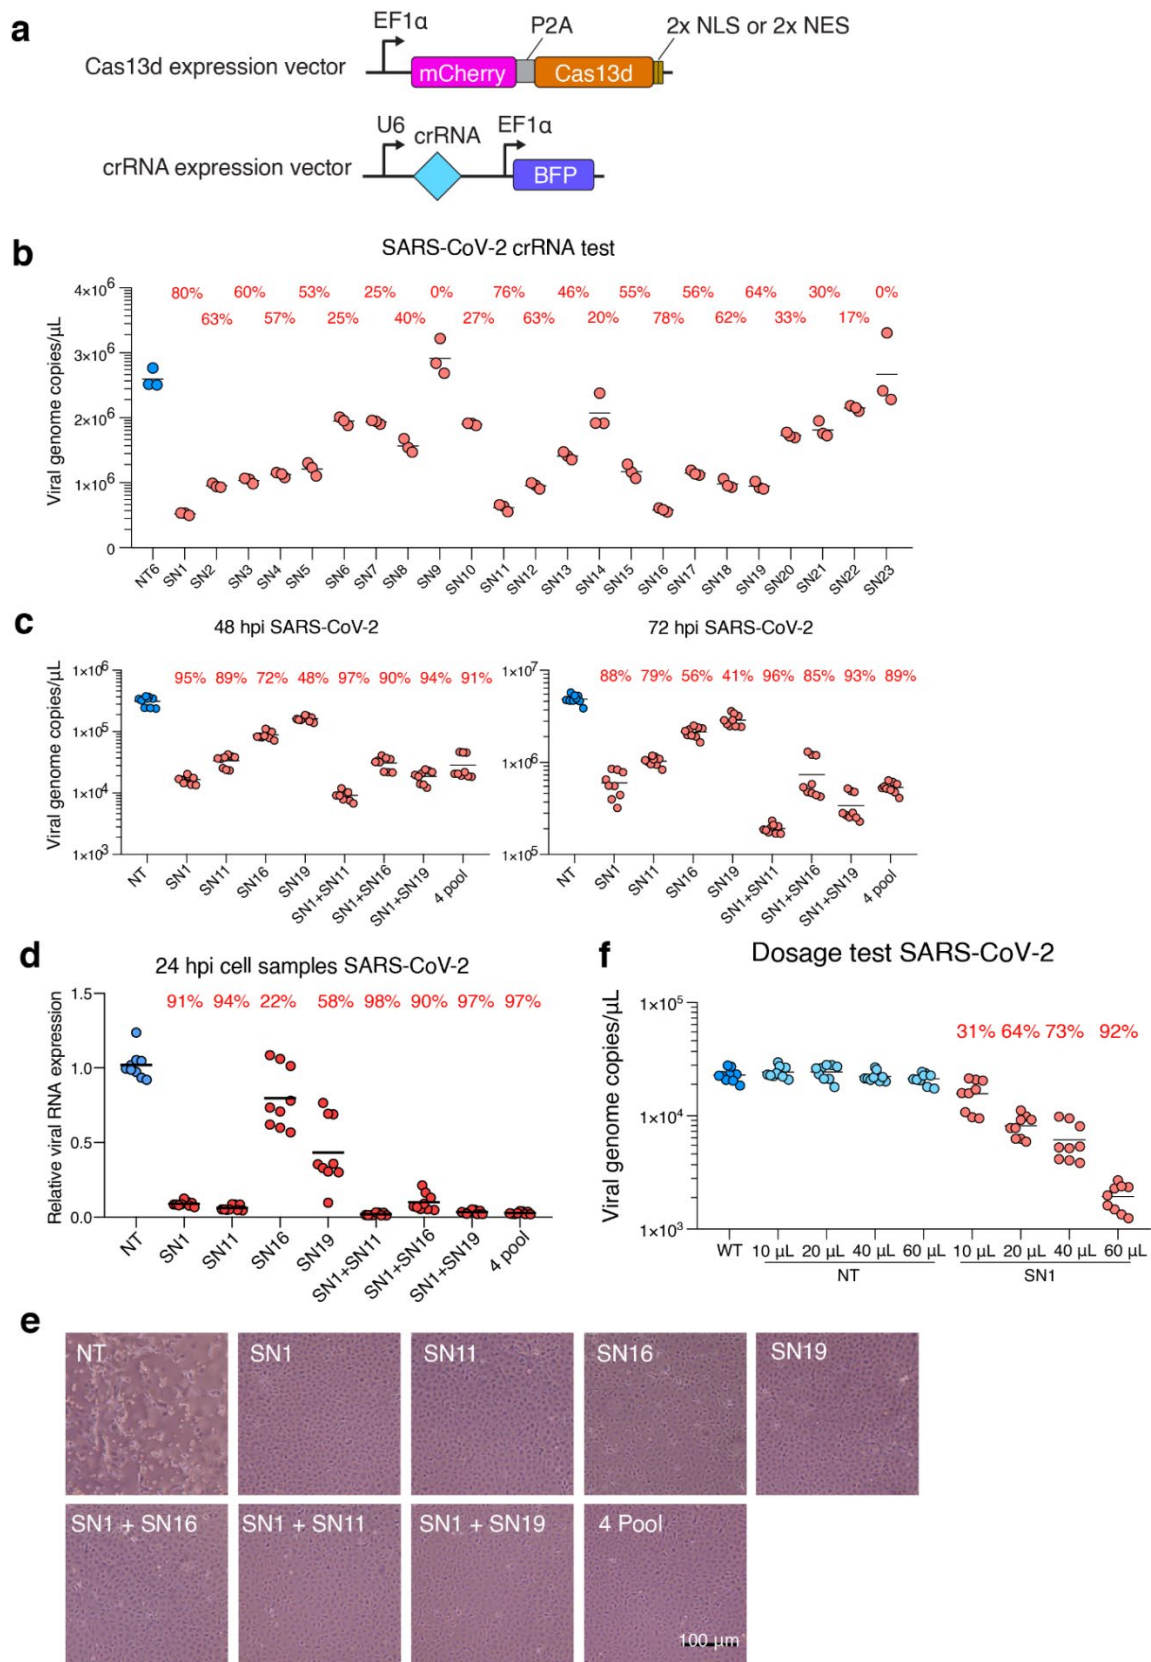

**Supplementary Figure 1 | Cas13d inhibits SARS-CoV-2 virus.** (a) The expression vector of Cas13d and crRNA used in this study. (b) Viral genome copies determined by RT-qPCR. The 23 crRNAs targeting the N gene of SARS-CoV-2 were tested in Vero E6/Cas13d stably transduced cells. NT, non-targeting crRNA. Cells were challenged with the USA-WA1/2020

strain of SARS-CoV-2; n = 1, t = 3. **(c)** The virus titer of the supernatant collected at 48 and 72 hpi. The best crRNAs from (b) were tested singly or combined as indicated; n = 3, t = 3. **(d)** The cell lysates of the same experiment from Figure 1e were collected at 24hpi and RT-qPCR was performed to quantify the relative expression of the N gene; n = 3, t = 3. **(e)** Brightfield images of Vero E6/NLS-Cas13d cells expressing indicated crRNA(s) and challenged with SARS-CoV-2; n = 1. **(f)** The virus production from cells that were transduced with different doses of lentivirus expressing the NT or SN1 crRNAs; n = 3, t = 3. n is the number of independent biological experiments. t is the number of technician replicates per biological replicate in the RT-qPCR assay. All source data in this figure are provided as a Source data file. p values are listed in Supplementary Data 3.

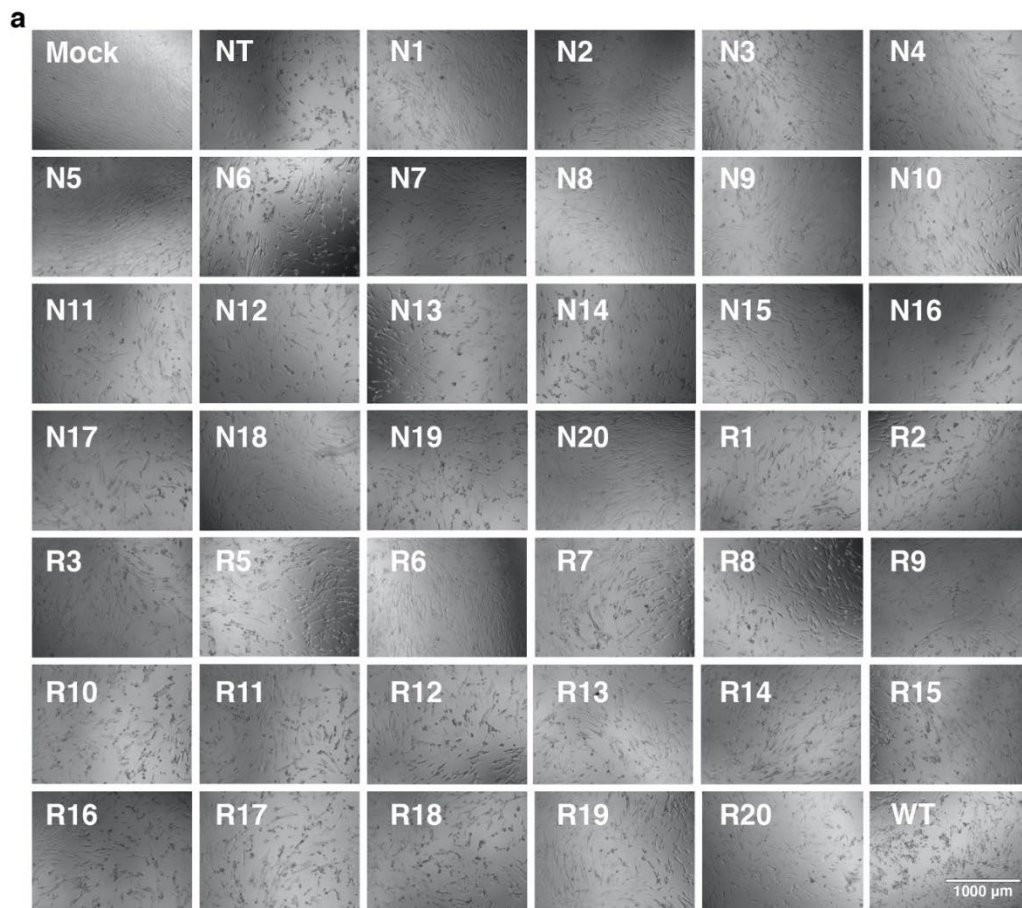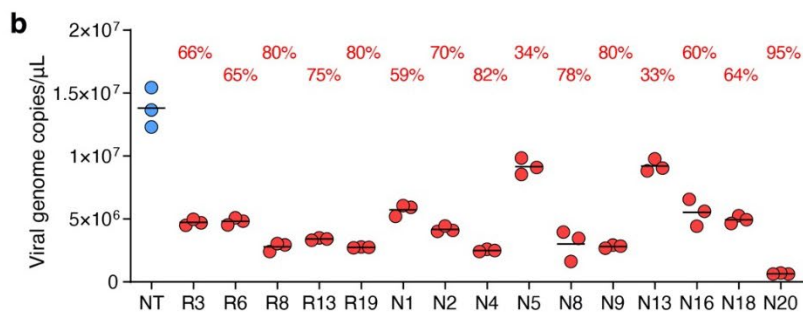

**Supplementary Figure 2 | Cas13d inhibits human coronavirus HCoV-229E. (a)** Bright field images of MRC-5 cells after 229E infection at 72 hpi;  $n = 1$ . The cells were co-transduced with NLS Cas13d and the indicated crRNAs and challenged with 229E 2 days later. **(b)** Viral genome copies in supernatant collected at 48 hpi were determined by RT-qPCR;  $n = 1$ ,  $t = 3$ .  $n$  is the number of independent biological experiments.  $t$  is the number of technician replicates per biological replicate in the RT-qPCR assay. All source data in this figure are provided as a Source data file.  $p$  values are listed in Supplementary Data 3.

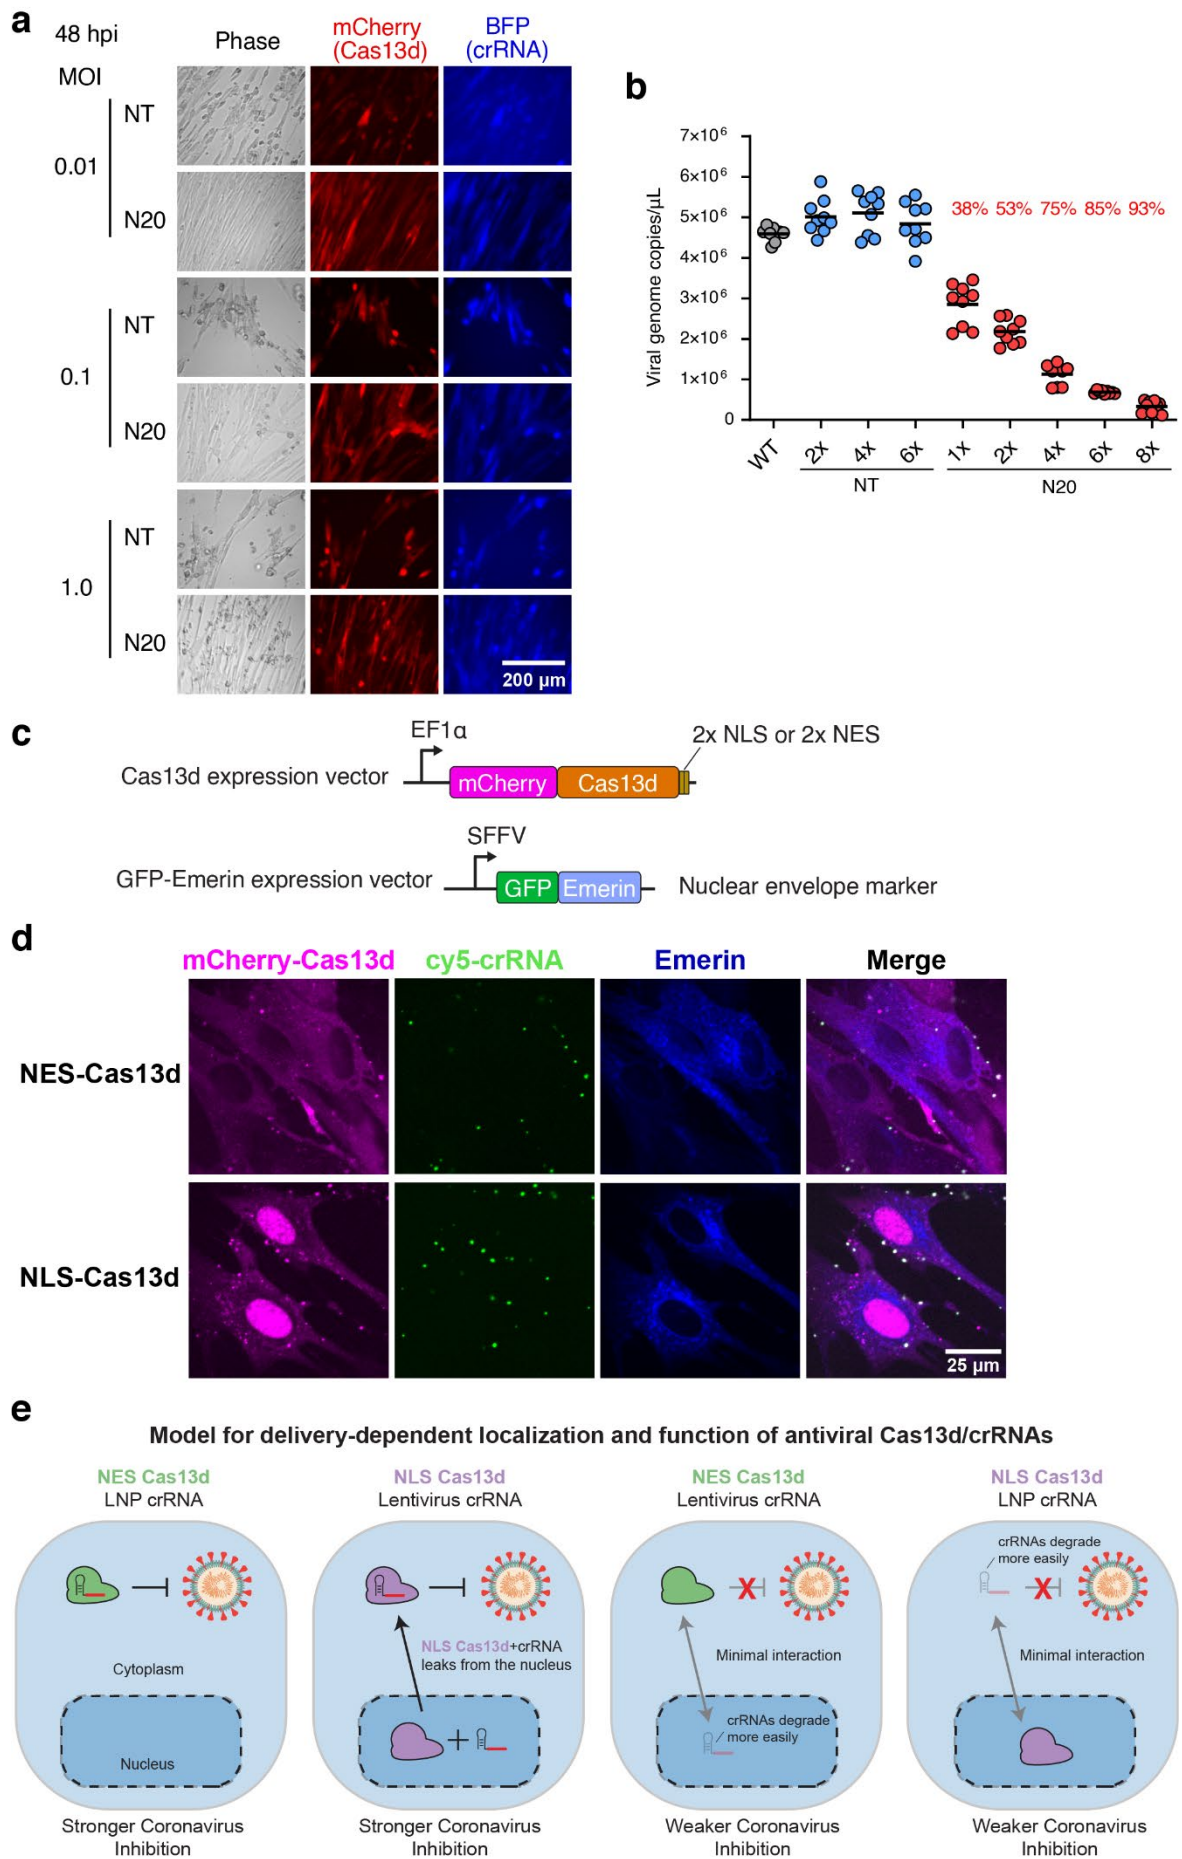

**Supplementary Figure 3 | Characterization of Cas13-mediated viral inhibition. (a)**

Microscopic images of MRC-5 cells infected with 229E at an MOI of 0.01, 0.1, or 1.0 at 48 hpi. NT, non-targeting crRNA; N20, 229E viral targeting crRNA; n = 3. **(b)** Virus production from cells that were transduced with different doses of lentiviruses of NLS Cas13d and either an NT crRNA or N20 crRNA; n = 3, t = 3. **(c)** The expression construct of mCherry infused Cas13d and the nuclear envelope marker GFP-Emerin were used for the **(d)** fluorescent microscopy of MRC-5 cells expressing mCherry-fused NES or NLS Cas13d along with GFP-Emerin (nuclear envelope marker), transfected Cy5 labeled crRNA, and fixed at 4 h post-transfection; n = 3. Punctae may indicate aggregates of Cas13d/crRNA without targeting RNAs. **(e)** Schema delineates that lentivirus and LNP delivered crRNA shows effective antiviral activity with NLS- and NES-Cas13d, respectively. n is the number of independent biological experiments. t is the number of technician replicates per biological replicate in the RT-qPCR assay. All source data in this figure are provided as a Source data file. p values are listed in Supplementary Data 3.

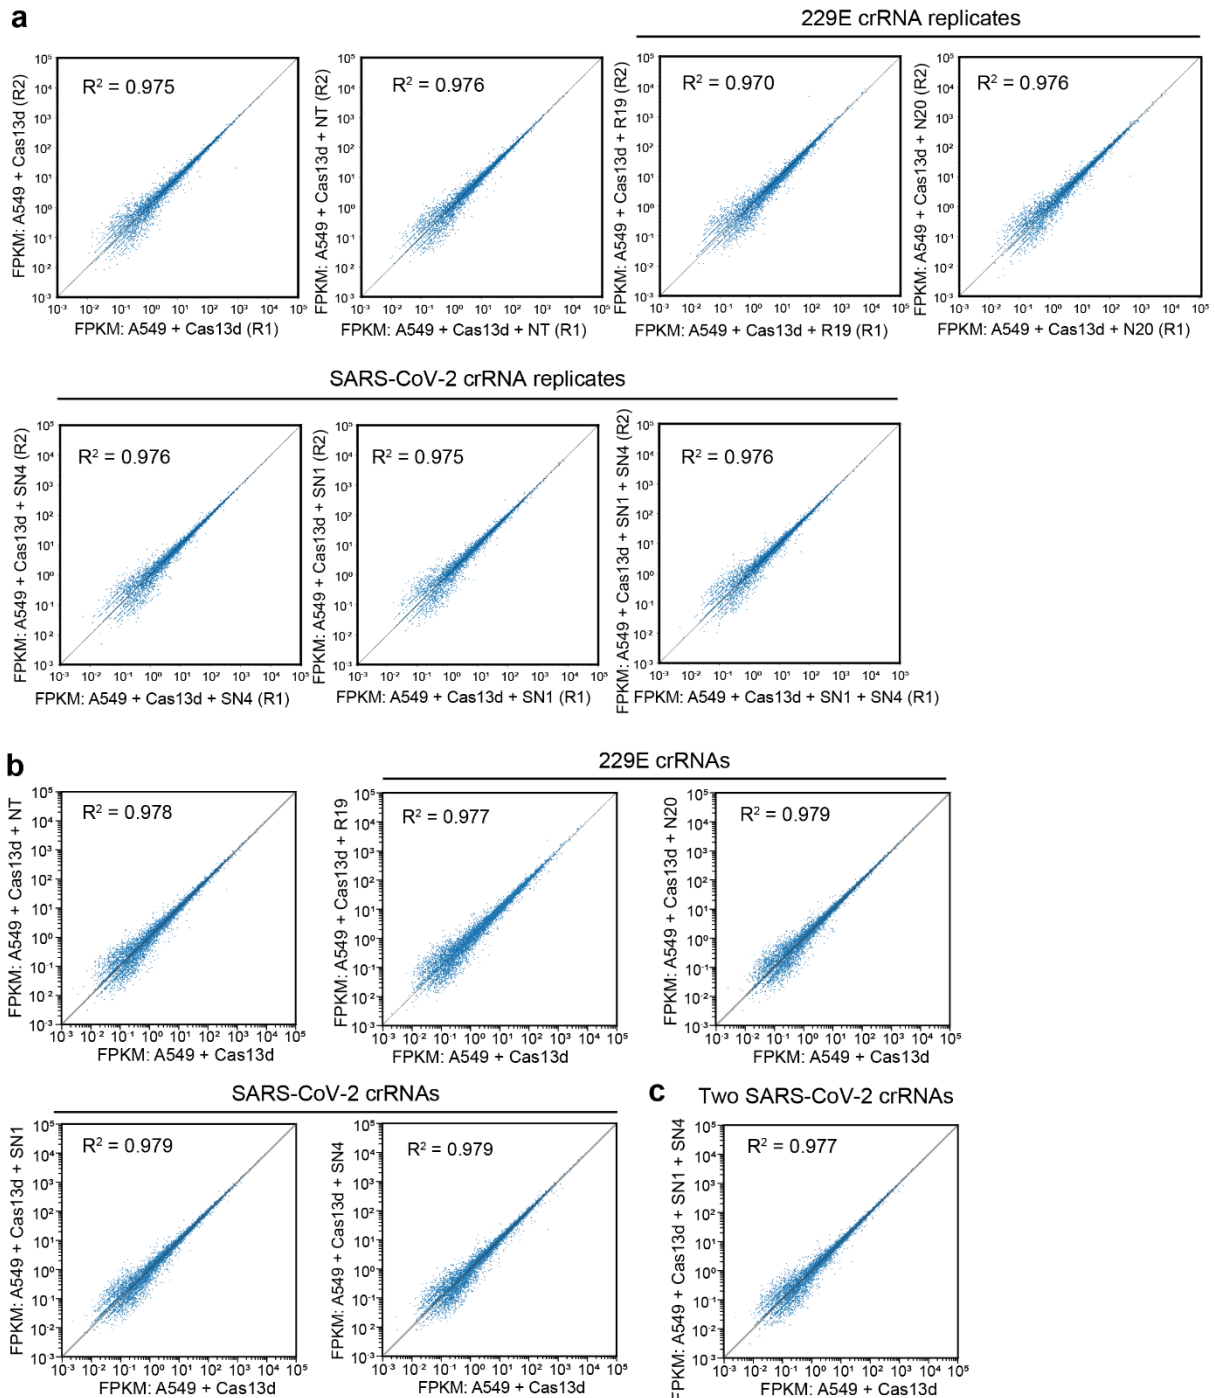

**Supplementary Figure 4 | The SARS-CoV-2 and 229E virus-targeting crRNAs are highly specific.** (a) Comparison of two replicates for each sample type of RNA-seq profiling data in A549 cells expressing Cas13d alone or Cas13d with one or two crRNAs without coronavirus targets. (b) RNA-seq profiling of A549 cells expressing Cas13d plus the non-targeting crRNA (NT), 229E crRNA R19, N20 or the SARS-CoV-2 crRNA SN1, SN4 compared with the cells only expressing Cas13d;  $n = 2$  biological replicates. (c) The transcriptome of A549 cells expressing Cas13d and two crRNAs, SN1 and SN4, were compared with the cells expressing Cas13d only;  $n = 2$  biological replicates.

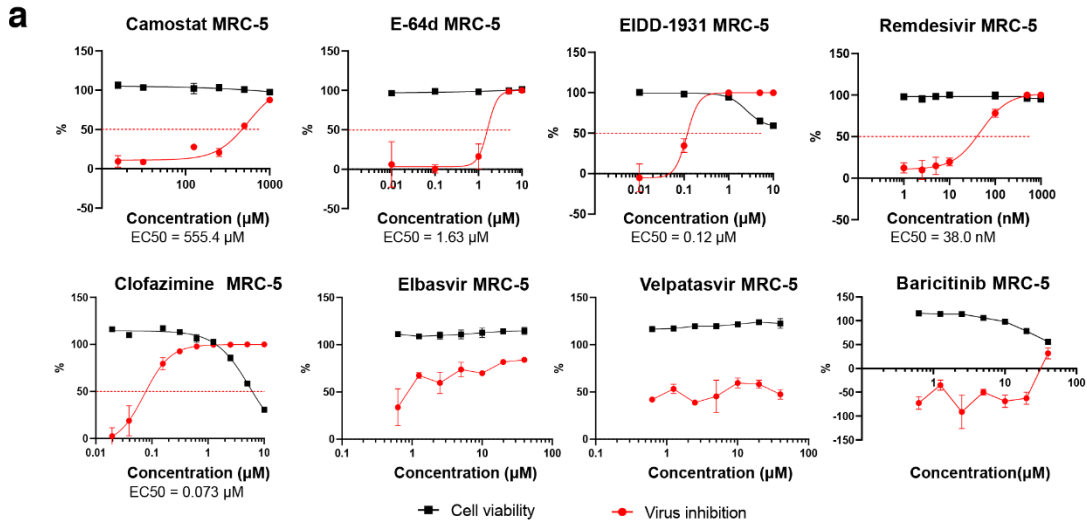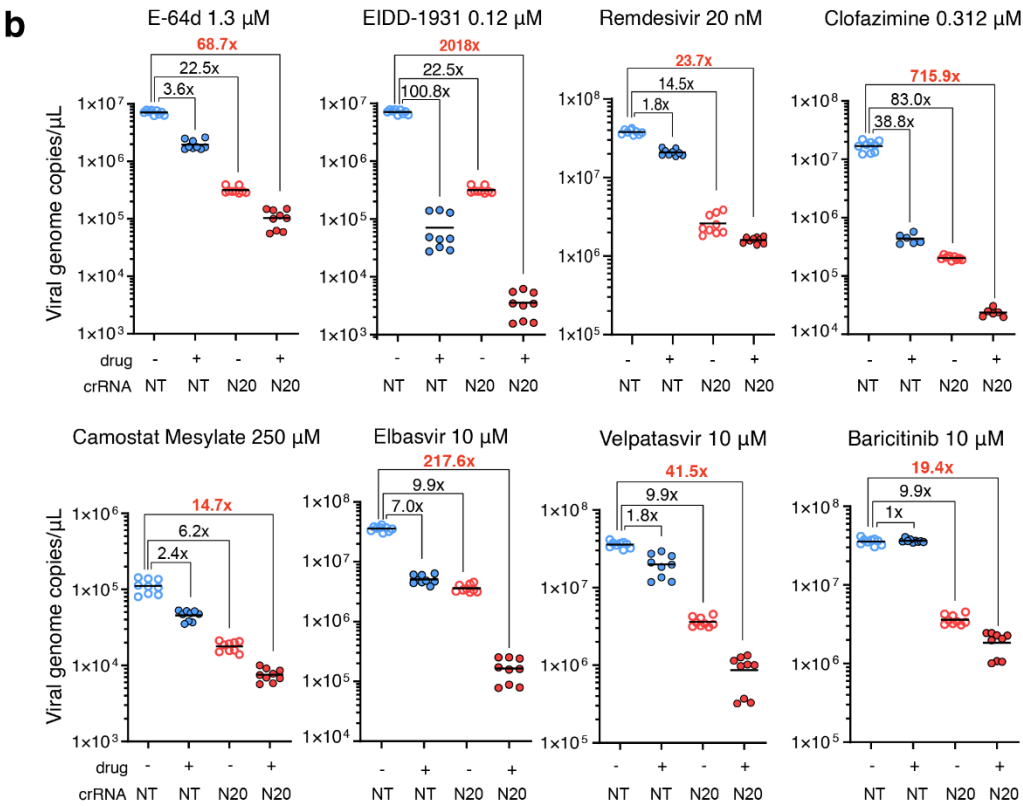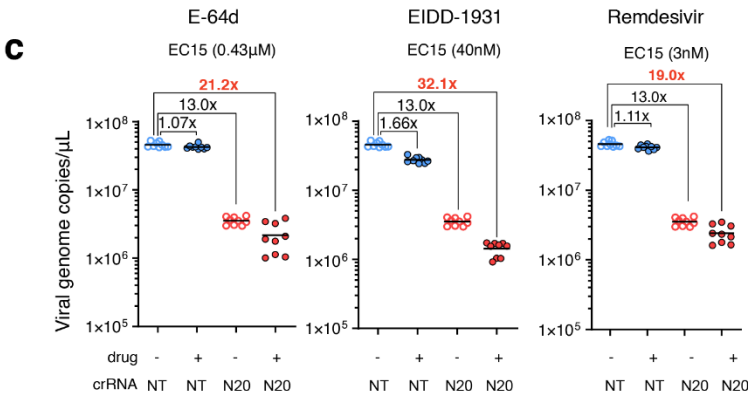

Supplementary Figure 5 | The combination of Cas13d antivirals with small molecule



**antiviral drugs enhances viral inhibition. (a)** The cytotoxicity and efficacy of indicated antiviral drugs in MRC-5 cells against 229E infection; for cytotoxicity test,  $n = 2$ ; for virus inhibition efficacy test,  $n = 3$ . **(b-c)** Viral genome copies determined by RT-qPCR;  $n = 3$ ,  $t = 3$ . **(b)** Cas13d and crRNA N20 were tested against 229E virus replication in combination with the indicated antiviral drugs at the indicated concentrations. **(c)** Cas13d and crRNAs combined with the indicated small molecule drugs at a lower dose (EC15).  $n$  is the number of independent biological experiments.  $t$  is the number of technician replicates per biological replicate in the RT-qPCR assay. All source data in this figure are provided as a Source data file.  $p$  values are listed in Supplementary Data 3.

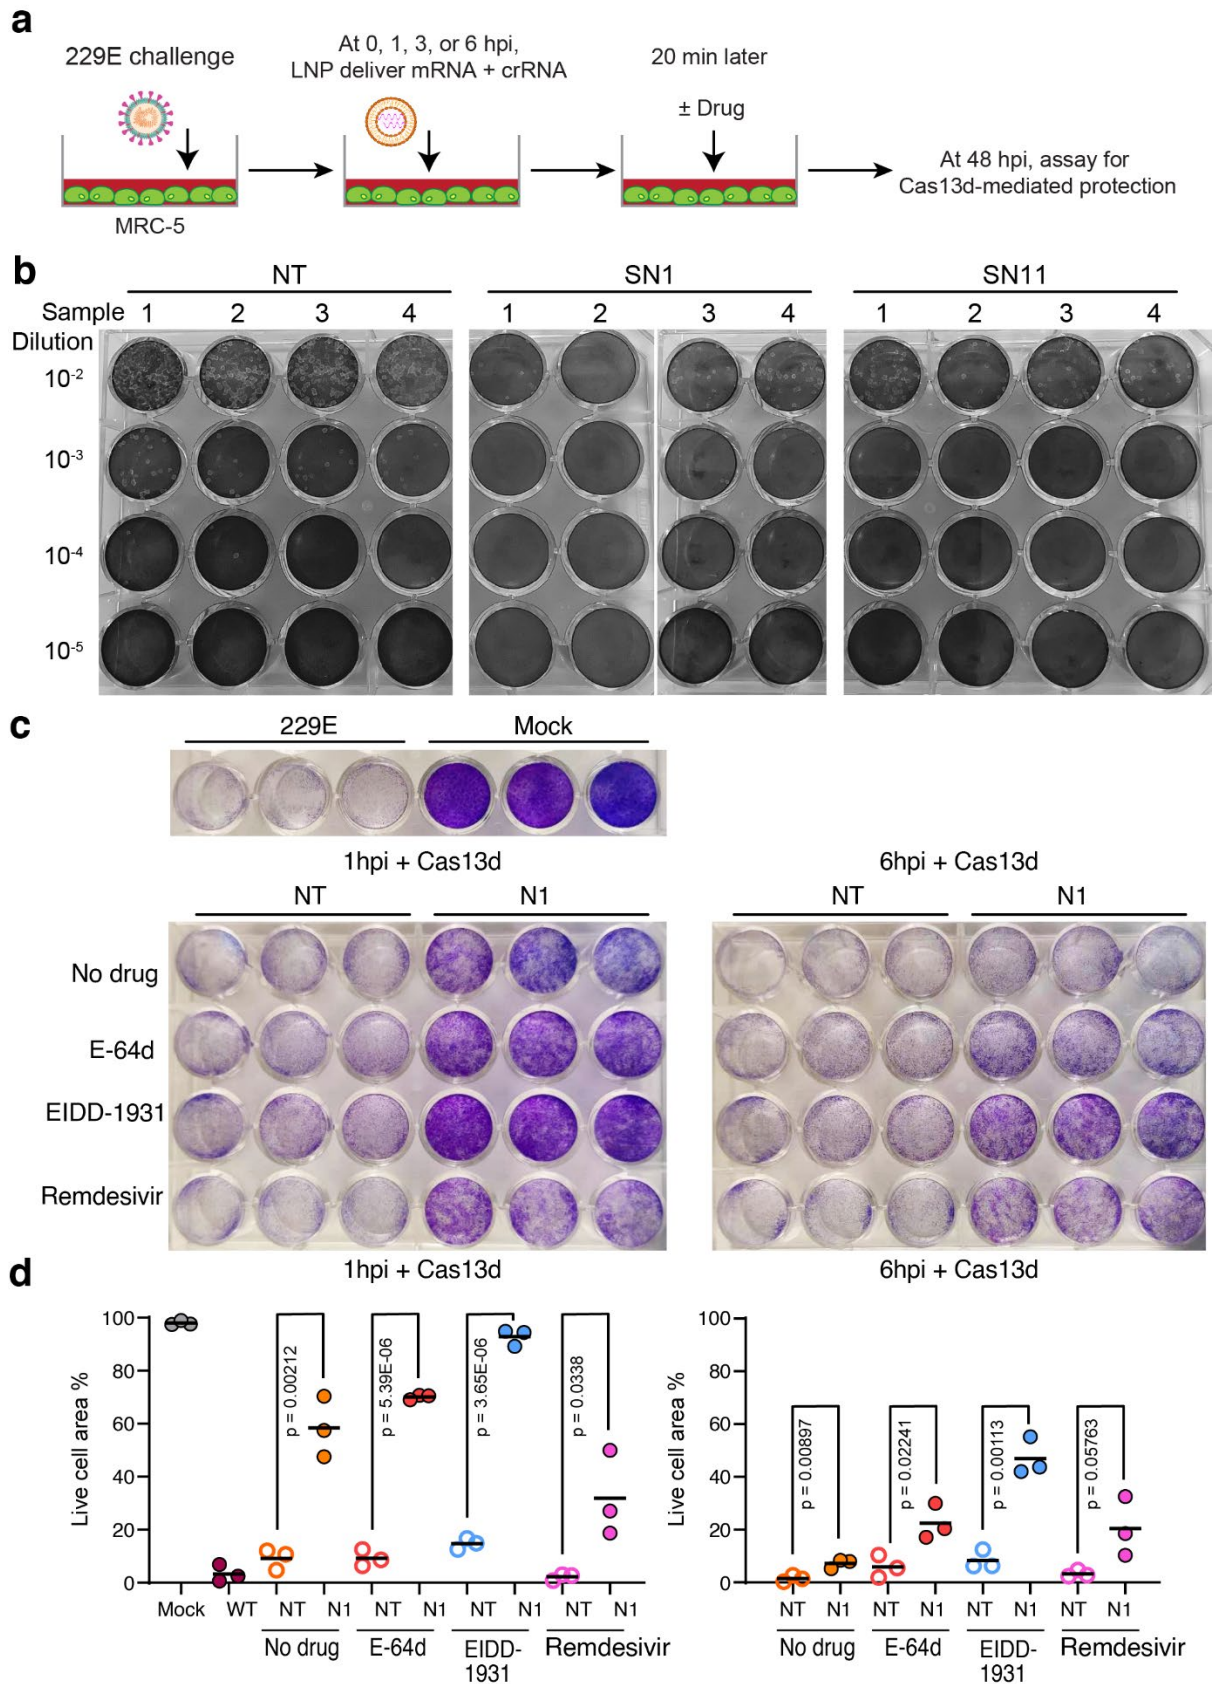

**Supplementary Figure 6 | Cas13d and antiviral crRNAs are effective for treatment of established 229E and SARS-CoV-2 infection. (a)** Schematic of the treatment of 229E infection. **(b)** Crystal violet staining of the Vero E6 cells at 5 days post-infection for plaque assay of the samples from **Figure 5b**. **(c)** Crystal violet staining of MRC-5 cells. MRC-5 cells

were mock-infected or infected with 229E at an MOI of 0.01. Cas13d mRNA and NT or N1 crRNA were delivered into the cells at 1 and 6 hpi by using Lipofectamine MessengerMax transfection. The cells were stained with crystal violet and photographed at 72 hpi. **(d)** Percent live-cell area of the stained cells was plotted; n = 3 wells. All source data in this figure are provided as a Source data file. p values are listed in Supplementary Data 3, calculated by two-tailed Student's t-test.

Supplementary fig. 7

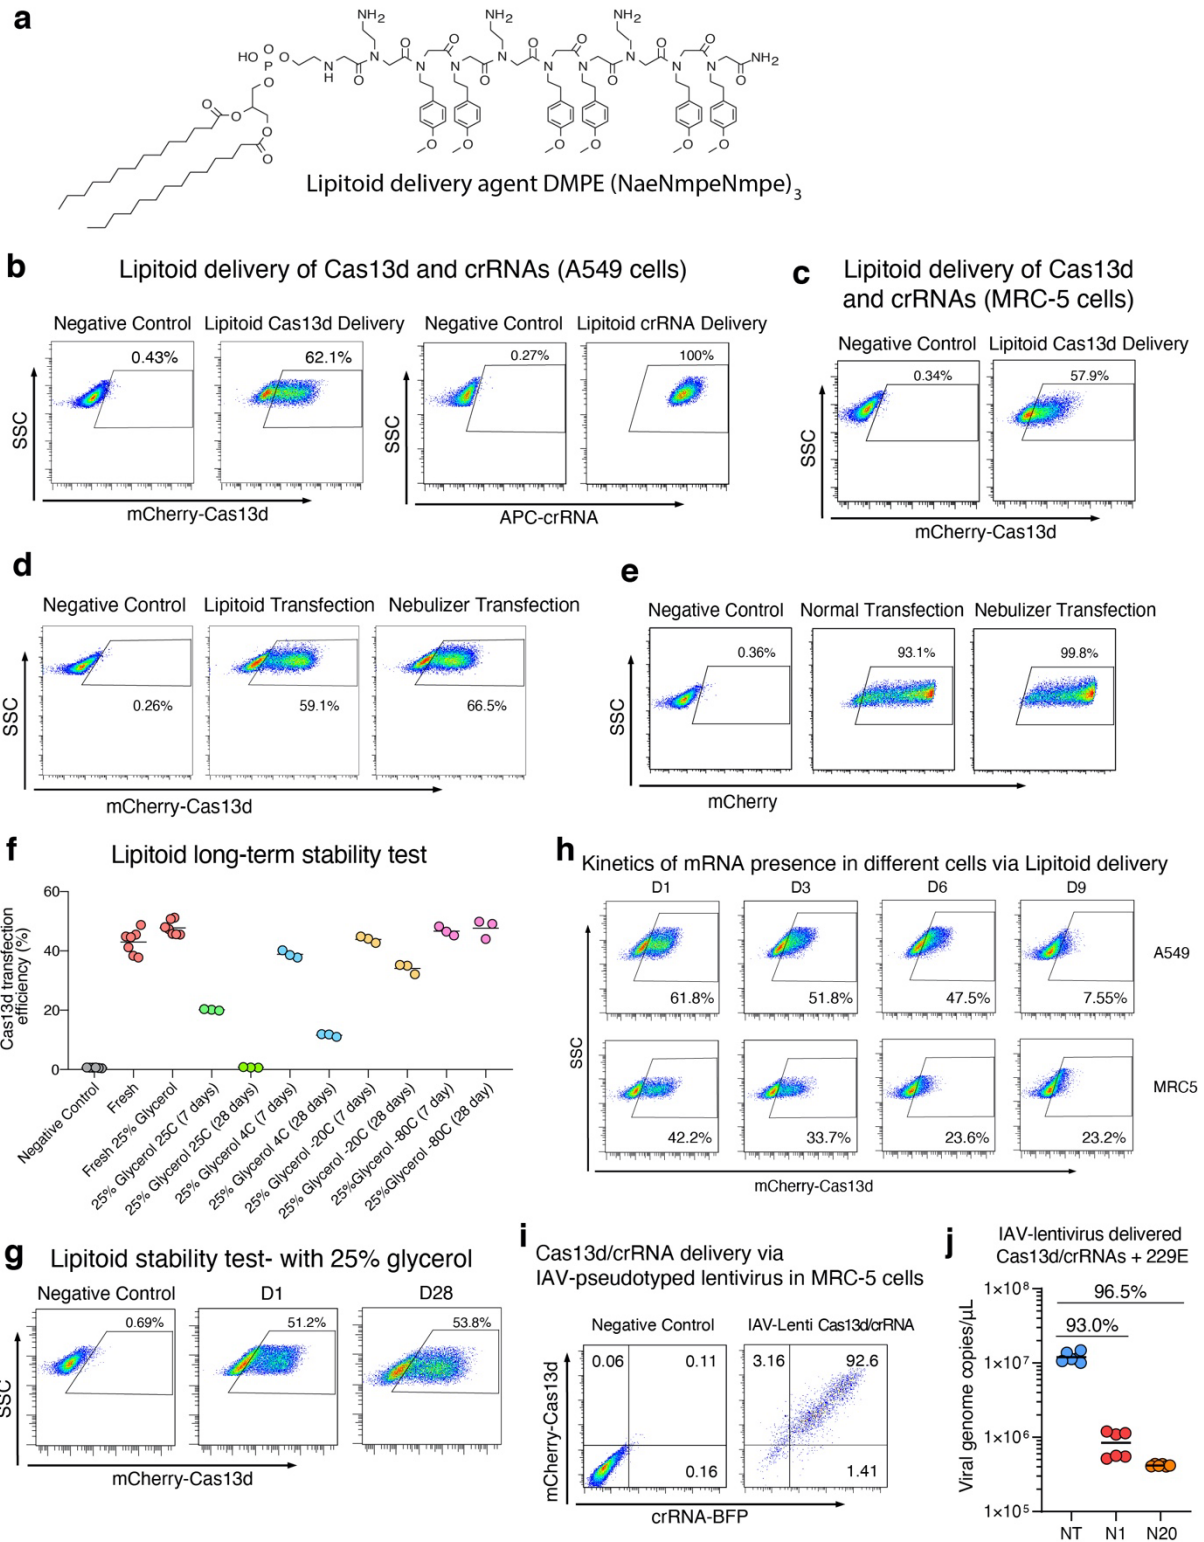

**Supplementary Figure 7 | Characterization of lipitoid delivery of Cas13d and crRNAs.** (a) Structure of the lipitoid delivery agent used in this study. (b-c) Flow cytometry analysis of A549 (b) and MRC5 (c) cells 2 days after transfection with Cas13d-mCherry mRNA and crRNA-cy5 using the lipitoid delivery agent. (d-e) Flow cytometry analysis of lipitoid delivery of mCherry-Cas13d (d) or mCherry (e) mRNA after standard transfection or transfection by nebulization. Delivery efficiency was determined by flow cytometric analysis 2 days after transfection. (f) The transfection efficiency of Cas13d-mCherry mRNA via lipitoid delivery; n =

6 for the negative control, fresh-made lipitoid complex, and fresh-made lipitoid complex containing 25% glycerol; n = 3 for the rest groups. Storage time is indicated in parentheses. The lipitoid nanoparticles supplemented with 25% Glycerol maintained their transfection capacity after 28 days of storage at -80°C. **(g)** Flow cytometric analysis of transfection with mCherry-Cas13d that had been stored in 25% glycerol for 1 or 28 days. **(h)** Flow cytometric analysis showing the kinetics of mCherry-Cas13d mRNA presence in A549 and MRC5 cells after lipitoid delivery. **(i)** The delivery efficiency of IAV-pseudotyped lentivirus containing mCherry-Cas13d or a crRNA and a BFP cassette in MRC-5 cells. **(j)** Viral genome copies of 229E determined by RT-qPCR. MRC-5 cells were co-transduced with NLS Cas13d and crRNA NT, N1, or N20 using IAV-pseudotyped lentivirus. The cells were infected with 229E 2 days later. Supernatant samples were collected and virus titer was determined at 48 hpi; n = 2, t = 3. p values for N1 ( $p = 5.74 \times 10^{-8}$ ) and N20 ( $p = 3.48 \times 10^{-8}$ ) were calculated relative to the viral titer obtained with the NT crRNA, by two-tailed Student's t-test. n is the number of independent biological experiments. t is the number of technician replicates per biological replicate in the RT-qPCR assay. All source data in this figure are provided as a Source data file.

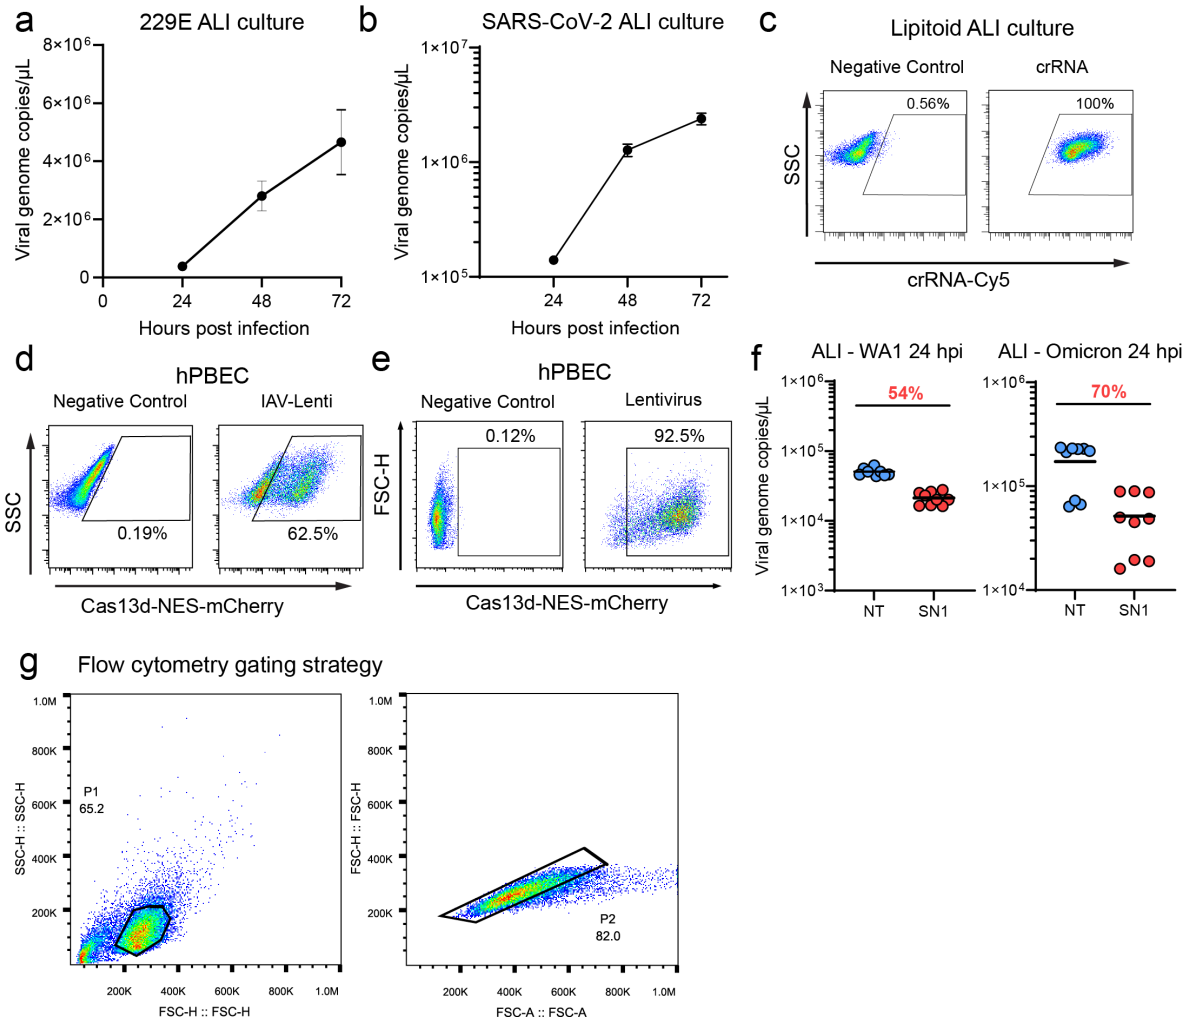

**Supplementary Figure 8 | Growth curve of 229E coronavirus and delivery of crRNAs using the lipidoid delivery agent in ALI cultures.** (a-b) The growth curve of 229E (at an MOI of 0.05) and SARS-CoV-2 (at an MOI of 0.6) virus in air-liquid interface (ALI) cultures;  $n = 3$ . Data presented as means  $\pm$  SEM. (c) Flow cytometry analysis of crRNA (labeled with cy5) delivery using LNP in ALI cultures. (d-e) Flow cytometry of hPBECs delivered with NES Cas13d using IAV- or VSV-pseudotyped lentivirus. (f) The titer of SARS-CoV-2 virus, including WA1 and Omicron strains, was determined at 24 hpi;  $n = 3$ ,  $t = 3$ . (g) The example of gating strategy for flow cytometry analysis.  $n$  is the number of independent biological experiments.  $t$  is the number of technician replicates per biological replicate in the RT-qPCR assay. All source data in this figure are provided as a Source data file. p values are listed in Supplementary Data 3.
