# Supplementary material for: Broad-spectrum CRISPR-mediated inhibition of SARS-CoV-2 variants and endemic coronaviruses in vitro
Source: PubMed Central journal article supplement (PMC9119983; doi:10.1038/s41467-022-30546-7), 2022-05-19
Supplement: 41467_2022_30546_MOESM3_ESM.pdf [file 41467_2022_30546_MOESM3_ESM.pdf]

**Title:** Supplementary Movie 1

**Description:** Time-lapse microscope imaging of MRC5 cells without 229E infection. Green signal represents dead cells stained by Cytotox Green Dye (#4633, Incucyte).

**Title:** Supplementary Movie 2

**Description:** Time-lapse microscope imaging of MRC5 cells with 229E infection at an MOI of 0.01. Green signal represents dead cells stained by Cytotox Green Dye (#4633, Incucyte).

**Title:** Supplementary Movie 3

**Description:** Time-lapse microscope imaging of MRC5 cells transduced with NLS-Cas13d and crRNA NT and infected with 229E at an MOI of 0.01. Green signal represents dead cells stained by Cytotox Green Dye (#4633, Incucyte). Red signal represents the cells expressing mCherry-P2A-NLS-Cas13d.

**Title:** Supplementary Movie 4

**Description:** Time-lapse microscope imaging of MRC5 cells transduced with NLS-Cas13d and crRNA N20 and infected with 229E at an MOI of 0.01. Green signal represents dead cells stained by Cytotox Green Dye (#4633, Incucyte). Red signal represents the cells expressing mCherry-P2A-NLS-Cas13d.

**Title:** Supplementary Data 1

**Description:** crRNA sequences used in the study.

**Title:** Supplementary Data 2

**Description:** Primers and probes used for RT-qPCR in the study.

**Title:** Supplementary Data 3

**Description:** p values calculated in the study
